# Supplementary material for: Development of a coarse-grained model for simulations of tridecanoin liquid–solid phase transitions
Source: Royal Society of Chemistry journal article supplement (doi:10.1039/c1cp20604d), 2011-01-01
Supplement: c1cp20604d.pdf [file c1cp20604d.pdf]

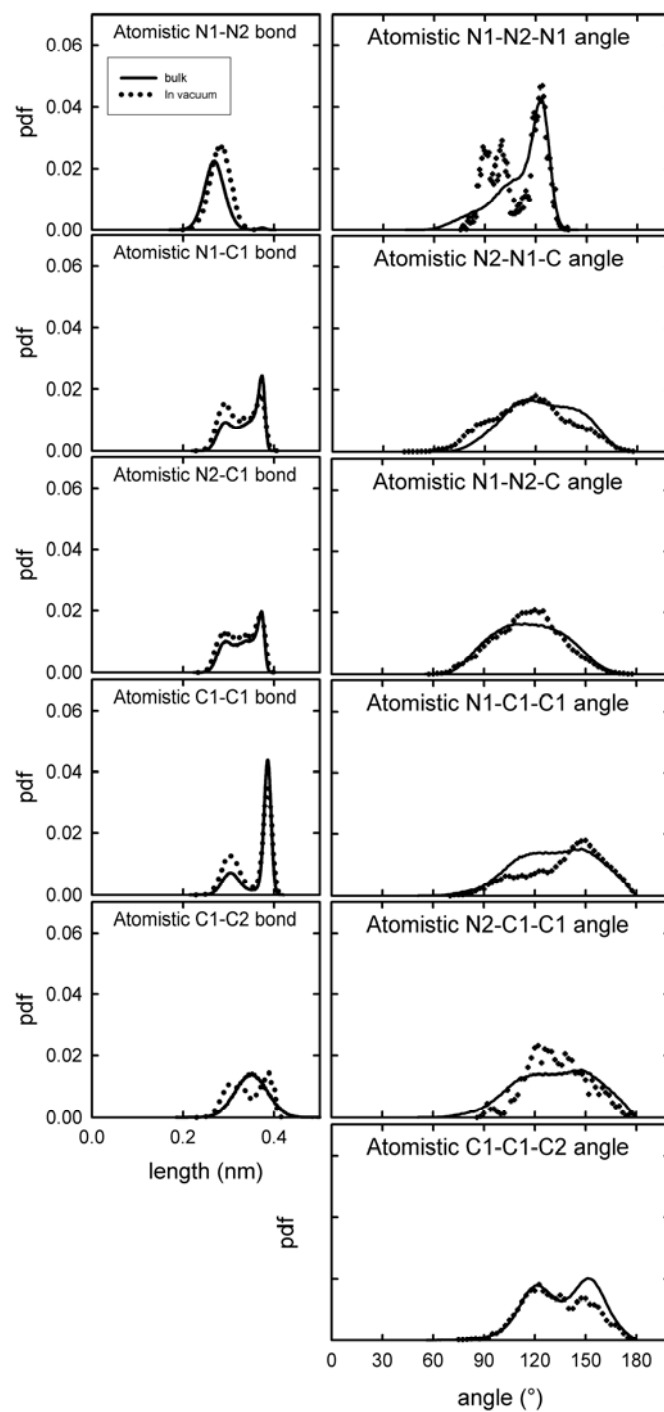

Fig. S1 Comparison between distributions of atomistic simulations between in bulk and one molecule in vacuum, obtained by switching off the non-bonded interactions between atoms beyond coarse-grained bonded-interacting distances
